# Supplementary material
Source: ML conference proceedings conference paper supplement (https://openreview.net/forum?id=OXhymu6MeN)
Supplement: supplementary_material [file attachment]

---

# Sub-optimality of the Naive Mean Field approximation for proportional high-dimensional Linear Regression

---

Anonymous Author(s)

Affiliation

Address

email

## Abstract

1 The Naïve Mean Field (NMF) approximation is widely employed in modern  
2 Machine Learning due to the huge computational gains it bestows on the statistician.  
3 Despite its popularity in practice, theoretical guarantees for high-dimensional  
4 problems are only available under strong structural assumptions (e.g. sparsity).  
5 Moreover, existing theory often does not explain empirical observations noted in  
6 the existing literature.

7 In this paper, we take a step towards addressing these problems by deriving sharp  
8 asymptotic characterizations for the NMF approximation in high-dimensional  
9 linear regression. Our results apply to a wide class of natural priors, and allow  
10 for model mismatch (i.e. the underlying statistical model can be different from  
11 the fitted model). We work under an *iid* Gaussian design and the proportional  
12 asymptotic regime, where the number of features and number of observations grow  
13 at a proportional rate. As a consequence of our asymptotic characterization, we  
14 establish two concrete corollaries: (a) we establish the inaccuracy of the NMF  
15 approximation for the log-normalizing constant in this regime, and (b) provide  
16 theoretical results backing the empirical observation that the NMF approximation  
17 can be overconfident in terms of uncertainty quantification.

18 Our results utilize recent advances in the theory of Gaussian comparison inequal-  
19 ities. To the best of our knowledge, this is the first application of these ideas to  
20 the analysis of Bayesian variational inference problems. Our theoretical results  
21 are corroborated by numerical experiments. Lastly, we believe our results can be  
22 generalized to non-Gaussian designs and provide empirical evidence to support it.

## 1 Introduction

24 The Naive Mean Field (NMF) approximation is widely employed in modern Machine Learning as an  
25 approximation to the actual intractable posterior distribution. The NMF approximation is attractive  
26 as (a) it bestows huge computational gains, and (b) is naturally interpretable and can provide access  
27 to easily interpretable summaries of the posterior distribution e.g., credible intervals. However, these  
28 two advantages may be overshadowed by the following limitations: (a) it is *a priori* unclear whether  
29 this strategy of using product distribution as a proxy for the true posterior will result in a “good”  
30 approximation, and (b) it has been empirically observed that NMF often tends to be significantly  
31 over-confident, especially when feature dimension  $p$  is not negligible compared to the sample size  
32  $n$ . In the traditional asymptotic regime ( $p$  fixed and  $n \rightarrow \infty$ ), significant progresses were made in  
33 understanding these two problems for different statistical models, see for instance [6] and references  
34 therein. On the other hand, in the complementary high-dimensional regime where both  $n$  and  $p$   
35 are growing, [5] recently established an instability result for topic model under the proportional  
36 asymptotics, i.e.  $n = \Theta(p)$ . In fact, in this regime, based on non-rigorous physics arguments it is

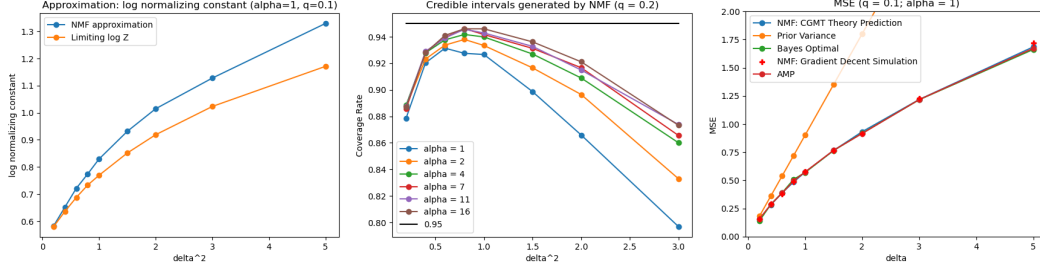

Figure 1: These three figures serve as a visual summary of our main results when the Gaussian Spike and Slab prior is adopted, i.e., NMF does not provide up to leading order correct approximation to the log-normalizing constant (left), and the estimated credible regions suggested by the NMF distribution do not achieve the nominal coverage (middle), even when NMF could achieve close to optimal MSE. Please see Lemma 5 for definitions of the Gaussian Spike and Slab prior and the hyper-parameters  $q$  and  $\Delta^2$ .

conjectured and partially established that instead of NMF free energy one should optimize the TAP free energy. In the context of linear regression, see [11, 17]. On the other hand, positive results of NMF for high-dimensional linear regression were recently established in [14] when  $p = o(n)$ .

In this paper, we investigate the performance of NMF approximation for linear regression under the proportional asymptotics regime. As a consequence of our asymptotic characterization, we establish two concrete corollaries: (a) we establish the inaccuracy of the NMF approximation for the log-normalizing constant in this regime, and (b) provide theoretical results backing the empirical observation that NMF can be overconfident in constructing Bayesian credible regions.

Before proceeding further, we formalize the setup under investigation. Given data  $\{(y_i, x_i) : 1 \leq i \leq n\}$ ,  $y_i \in \mathbb{R}$ ,  $x_i \in \mathbb{R}^p$ , the scientist fits a linear model

$$Y = X\beta^* + \epsilon, \quad (1)$$

where  $\epsilon_i \stackrel{iid}{\sim} \mathcal{N}(0, \sigma^2)$  and  $\beta^* \in S^p$  is a  $p$ -dimensional latent signal. We consider either  $S = \mathbb{R}$  or  $S = [-1, 1]$ . In fact,  $S = \mathbb{R}$  unless explicitly specified otherwise; most of our results generalize to bounded support naturally. To recover the latent signal, the scientist adapts a Bayesian approach. She puts an *iid* prior on  $\beta_i$ 's, namely,  $d\pi_0(\beta) = \prod_{i=1}^p d\pi(\beta_i)$  and then constructs the posterior distribution of  $\beta$ ,

$$\frac{d\mu}{d\pi_0}(\beta) = \frac{d\mu_{X,Y}}{d\pi_0}(\beta) \propto e^{-\frac{1}{2\sigma^2}\|Y - X\beta\|^2},$$

with normalization constant

$$Z_p = Z_p(X, Y) = \int_{S^p} e^{-\frac{1}{2\sigma^2}\|Y - X\beta\|^2} \pi_0(d\beta). \quad (2)$$

Our results are established assuming that the design matrix  $X$  is randomly sampled from an *iid* Gaussian ensemble, i.e.  $X_{ij} \stackrel{iid}{\sim} \mathcal{N}(0, 1/n)$ , while we provide empirical evidence for more general classes of  $X$  that has *iid* entries with mean 0 and variance  $1/n$ . Moreover, we assume  $n/p \rightarrow \alpha \in (0, \infty)$  as  $n, p \rightarrow \infty$ .

**Definition 1** (Exponential tilting). For any  $\gamma := (\gamma_1, \gamma_2) \in \bar{\mathbb{R}} \times \mathbb{R}^+$  and probability distribution  $\pi$  on  $S$ , we define  $\pi^\gamma$  as

$$\frac{d\pi^\gamma}{d\pi}(x) := \exp\left(\gamma_1 x - \frac{\gamma_2}{2} x^2 - c(\gamma)\right), \quad c(\gamma) = c_\pi(\gamma) := \log \int_S \exp\left(\gamma_1 x - \frac{\gamma_2}{2} x^2\right) \pi(dx).$$

Note that  $c(\cdot)$  depends on the distribution  $\pi$  and is usually referred to as the cumulant generating function in statistics literature.

Using this definition of exponential tilts, the  $(X^T X)_{ii} \beta_i^2$  terms in (2) can be absorbed into the base measure

$$\mu(d\beta) \propto e^{-\frac{1}{2\sigma^2}\|y - X\beta\|^2 + \sum_{i=1}^p \frac{d_i}{2} \beta_i^2} \prod_{i=1}^p \pi_i(d\beta_i),$$

where  $\pi_i := \pi^{(0, d_i)}$  and  $d_i := \frac{(X^T X)_{ii}}{\sigma^2}$ . By the classical Gibbs variational principle (see for instance [25]), the log-normalizing constant can be written as a variational form,

$$\begin{aligned} -\log Z_p &= \inf_Q \left( \mathbb{E}_Q \left[ \frac{1}{2\sigma^2} \|y - X\beta\|^2 \right] + D_{KL}(Q \| \pi_0) \right) \\ &= \inf_Q \left( \mathbb{E}_Q \left[ \frac{1}{2\sigma^2} \|y - X\beta\|^2 - \sum_{i=1}^p \frac{d_i}{2} \beta_i^2 \right] + D_{KL} \left( Q \left\| \prod_{i=1}^p \pi_i \right\| \right) \right) - \sum_{i=1}^p c(0, d_i), \end{aligned}$$

where the inf is taken over all probability distribution on  $S^p$ . While the infimum is always attained if and only if  $Q = \mu$ , the Naive Mean Field (NMF) approximation restricts the variational domain to product distributions only and renders a natural upper bound,

$$Q = \prod_{i=1}^p Q_i \left[ \mathbb{E}_Q \left( \frac{1}{2\sigma^2} \|y - X\beta\|^2 - \sum_{i=1}^p \frac{d_i}{2} \beta_i^2 \right) + D_{KL} \left( Q \left\| \prod_{i=1}^p \pi_i \right\| \right) - \sum_{i=1}^p c(0, d_i) \right]. \quad (3)$$

It can be shown that the product distribution  $\hat{Q}$  that achieves this infimum is exactly the one closest to  $\mu$ , in terms of KL-divergence. Before moving forward, we need some additional definitions and basic properties of exponential tilts. The first lemma establishes that instead of using  $(\gamma_1, \gamma_2)$  we can also use  $(u, \gamma_2) = (\mathbb{E}_{U \sim \pi^\gamma} U, \gamma_2)$  to parameterize the tilted distribution.

**Lemma 1** (Basic properties of the cumulant generating function  $c(\cdot)$ ). *Let  $c(\cdot)$  be as in Definition 1. Let  $\text{supp}(\pi)$  denote the support of  $\pi$ . If  $m(\pi) := \inf \text{supp}(\pi) < 0$  and  $M(\pi) := \sup \text{supp}(\pi) > 0$ , then the following conclusions hold. (a)  $\dot{c}(\gamma_1, \gamma_2) := \frac{\partial c(\gamma_1, \gamma_2)}{\partial \gamma_1} = \mathbb{E}_{X \sim \pi^\gamma}(X)$  is strictly increasing in  $\gamma_1$ , for every  $\gamma_2 \in \mathbb{R}$ , and (b) For any  $u \in (m(\pi), M(\pi))$ , there exists a unique  $h(u, \gamma_2) \in \mathbb{R}$  such that  $\dot{c}(h(u, \gamma_2), \gamma_2) = u$ .*

**Definition 2** (Naive mean field variational objective). *With  $d_i := (X^T X)_{ii}/\sigma^2$ , we define  $M_p(u) : [-1, 1]^p \rightarrow \mathbb{R}$  as*

$$M_p(u) := \frac{1}{2\sigma^2} \|y - Xu\|^2 + \sum_{i=1}^p \left[ G(u_i, d_i) - \frac{d_i u_i^2}{2} \right],$$

where  $G$  is defined as a possibly extended real valued function on  $[m(\pi), M(\pi)] \times \mathbb{R}$ ,

$$\begin{aligned} G(u, d) &:= D_{KL}(\pi^{(u, d)} \| \pi^{(0, d)}) = uh(u, d) - c(h(u, d), d) + c(0, d) & \text{if } u \in (m(\pi), M(\pi)), d \in \mathbb{R}, \\ &:= D_{KL}(\pi_\infty \| \pi^{(0, d)}) & \text{if } u = M(\pi) < \infty, d \in \mathbb{R}, \\ &:= D_{KL}(\pi_{-\infty} \| \pi^{(0, d)}) & \text{if } u = m(\pi) > -\infty, d \in \mathbb{R}, \end{aligned}$$

in which  $h(\cdot, \cdot)$  was defined in Lemma 1 and  $\pi_\infty$  and  $\pi_{-\infty}$  are degenerate distributions which assigns all measure to  $M(\pi)$  and  $m(\pi)$  respectively.

Note that under product distributions, the  $\mathbb{E}_Q(\cdot)$  term in (3) is parameterized by the mean vector  $u := \mathbb{E}_Q \beta$  and exponential tilts of  $\pi_i$ 's minimize the KL-divergence term. Therefore, the scaled log-normalizing function, which is also refereed to as the average free energy in statistical physics parlance and (log) evidence in Bayesian statistics, is bounded by the following variational form,

$$-\frac{1}{p} \log Z_p \leq \frac{1}{p} \inf_{u \in [m(\pi), M(\pi)]^p} M_p(u) - \frac{1}{p} \sum_{i=1}^p c(0, d_i) = -\frac{1}{p} \log \mathcal{Z}_p^{\text{NMF}}. \quad (4)$$

The right hand side is equal to (3) and is also refereed to as the evidence lower bound (ELBO) or NMF free energy, which can be used as a model selection criterion, see for instance [12]. Asymptotically, the second term is nothing but a constant since it concentrates around  $c(0, 1/\sigma^2)$  as  $n, p \rightarrow \infty$ .

The main theoretical question of interest here is whether this bound in (4) is asymptotically tight or not, which serves as the fundamental first step towards answering the question of whether NMF distribution is a good approximation of the target posterior. Please see for instance [2, 25] for comprehensive surveys on variational inference, including but not limited to NMF approximation.

To derive sharp asymptotics for the NMF approximation, our key observation is to note that under certain priors, the optimization problem is actually convex, and then employ the Convex Gaussian Min-max Theorem (CGMT). CGMT is a generalization of the classical Gordon's Gaussian comparison

inequality [7], which allows one to reduce a minimax problem parameterized by a Gaussian process to another (tractable) minimax Gaussian optimization problem. This idea was pioneered by [20] and then applied to many different statistical problems, including regularized regression, M-estimation and so on, see for instance [13, 22]. Unfortunately, concentration results derived from CGMT require both Gaussianity and convexity. This is exactly why we need the Gaussian design assumption in our analysis. In the meantime, though we do not pursue this front theoretically, we provide empirical evidence for more general design matrices in the Supplementary Material. It is worth noting that there is a parallel line of research that aims at developing universality results for these comparison techniques. We refer the interested reader to [9] and references within.

Let us emphasise that our main conceptual concern is not investigating whether (4) as a convex optimization procedure gives a good point estimator, but rather evaluating whether NMF as a strategy or product distributions as a family of distributions can provide “close to correct” approximation for the true posterior. Nevertheless, as a by product of our main theorem, asymptotic mean square error of this optimizer can also be characterized.

Regarding accuracy of variational approximations in general, certain contraction rate and asymptotic normality results were established in the traditional fixed  $p$  large  $n$  regime, see for instance [26, 16, 8]. However, note that under the high-dimensional setting and scaling we consider in the current paper, without extra structural assumptions (e.g. sparsity), both the true posterior and its variational approximation are not expected to contract towards the true signal, which also explains why one is instead interested in whether the log-normalizing constant can be well approximated, as a weaker standard of “correctness”. Authors of [18] studied a pre-specified class of mean field approximation in sparse high-dimensional logistic regression. Recently, the first known results on mean and covariance approximation error of Gaussian Variational Inference (GVI) in terms of dimension and sample size were obtained in [10].

Throughout, we work under a partially well-specified situation, i.e., model (1) is assumed to be correct but  $\beta_i^*$ ’s may not have been *a priori* sampled *iid* from  $\pi$ . Instead, we assume the empirical distribution of  $\beta_i^*$ ’s converges in  $L_2$  to a probability distribution  $\pi^*$  supported on  $S$ . In addition, the noise level  $\sigma^2$  is fixed and known to the statistician. Last but not least,  $\pi^*$  is assumed to have finite second moment and let  $s_2 := \mathbb{E}_{S \sim \pi^*}[S^2] < \infty$ .

## 2 Main results

In this section, we start with some necessary notations and definitions. Then we identify a wide class of priors that would ensure convexity of the NMF objective. Finally, we present our main theorem and one natural corollary.

**Definition 3.** Define  $F : (m(\pi), M(\pi)) \rightarrow \mathbb{R}$  as

$$F(u) = F_{\pi, \sigma^2}(u) := G(u, \mathbb{E}d_1) - \frac{u^2 \mathbb{E}d_1}{2} = G\left(u, \frac{1}{\sigma^2}\right) - \frac{u^2}{2\sigma}.$$

In addition, let  $\hat{u} = \hat{\beta}_{NMF} := \arg \min_{u \in [-1, 1]^p} M_p(u)$  be the NMF point estimator, which is also the mean vector of the product distribution ( $\hat{Q}$ ) that best approximates the posterior in terms of KL-divergence. We refer to this optimal product distribution as the NMF distribution.

As alluded, our analysis relies on convexity of the “penalty” term  $F(\cdot)$ . Therefore we first introduce a few sufficient conditions on the prior  $\pi$  that ensure (strong) convexity of  $F(\cdot)$ . Please note all these conditions only depend on the prior that the statistician chose to use, rather than the “true prior”  $\pi^*$ .

**Lemma 2** (Condition to ensure convexity of  $F(\cdot)$ : nice prior). Suppose  $\pi$  is absolutely continuous with respect to Lebesgue measure and

$$\frac{d\pi}{dx}(x) \propto e^{-V(x)}, \forall x \in \text{support}(\pi),$$

for some  $V : \text{support}(\pi) \rightarrow \mathbb{R}$ . In addition, suppose either of the following two conditions is true,

1.  $\text{support}(\pi) = \mathbb{R}$ ;  $V(x)$  is continuously differentiable almost everywhere;  $V(x)$  is unbounded above at infinity.

141 2.  $\text{support}(\pi) = [-a, a]$ , for some  $0 < a < \infty$ ;  $V(x)$  is continuously differentiable almost  
 142 everywhere.

143 Then if  $V(x)$  is even, non-decreasing in  $|x|$  and  $V'(x)$  is convex,  $F(\cdot)$  is always strongly convex,  
 144 regardless of the value of  $\sigma^2$ .

145 **Lemma 3** (Condition to ensure convexity of  $F(\cdot)$ : discrete prior). Suppose  $\pi$  is a symmetric discrete  
 146 distribution supported on  $\{-1, 0, 1\}$ ,

$$\pi(\mathrm{d}x) = q\delta(x) + \frac{1-q}{2}\delta(x-1) + \frac{1-q}{2}\delta(x+1),$$

147 for  $q \in (2/3, 1)$ . Then  $F(\cdot)$  is always strongly convex, regardless of the value of  $\sigma^2$ .

148 Proofs of Lemma 2 and 3 crucially utilize the Griffiths-Hurst-Sherman (GHS) inequality [3, 4], which  
 149 arose from the study of correlation structure in spin systems. The next two lemmas give examples of  
 150 some other families of priors for which convexity of  $F(\cdot)$  depends on the noise level  $\sigma^2$ , while those  
 151 in Lemma 2 and 3 do not.

152 **Lemma 4** (Condition to ensure convexity of  $F(\cdot)$ : low signal-to-noise ratio). Suppose  $\text{support}(\pi) \subset$   
 153  $[-a, a]$  for some  $a > 0$ . Then as long as  $\sigma^2 > a^2$ ,  $F(u) = F_\pi(u, \sigma^2)$ , as a function of  $u$ , is always  
 154 strongly convex on  $S$ , regardless of the exact choice of  $\pi$  and value of  $\sigma^2$ .

155 **Lemma 5** (Condition to ensure convexity of  $F(\cdot)$ : Spike and Slab prior). Consider a spike and slab  
 156 prior of the following form,

$$\pi(\mathrm{d}x) = q\delta(x) + \frac{1-q}{\sqrt{2\pi}\Delta^2} e^{-\frac{x^2}{2\Delta^2}} \mathrm{d}x$$

157 which is just a mixture of a point mass at 0 and a Normal distribution of mean 0 and variance  $\Delta^2$ .  
 158 Suppose

$$\min_{h \in \mathbb{R}} \text{Var}_{X \sim \pi_{\tilde{q}, \tilde{\Delta}^2}}(X) < \sigma^2 \quad (5)$$

159 where  $\pi_{\tilde{q}, \tilde{\Delta}^2}$  is again a Gaussian spike and slab mixture,

$$\pi(\mathrm{d}x) = \tilde{q}\delta(x) + \frac{1-\tilde{q}}{\sqrt{2\pi}\tilde{\Delta}^2} e^{-\frac{x^2}{2\tilde{\Delta}^2}} \mathrm{d}x$$

$$\text{with } \tilde{q} = \frac{q}{q + (1-q)(1 + \Delta^2/\sigma^2)^{-1/2}} \quad \text{and} \quad \tilde{\Delta}^2 = \frac{\sigma^2 \Delta^2}{\sigma^2 + \Delta^2}.$$

160 Then  $F(u)$  is strongly convex. In addition, one easier to check sufficient condition for (5) is

$$\left(1 + \frac{2q}{1-q} \sqrt{1 + \frac{\Delta^2}{\sigma^2}}\right) \frac{\Delta^2}{\sigma^2 + \Delta^2} < 1. \quad (6)$$

161 **Remark 1.** It is easy to see that for large enough  $\sigma$  ( $q$  and  $\Delta$  fixed), or small enough  $q$  ( $\Delta$  and  $\sigma$   
 162 fixed), or small enough  $\Delta$  ( $q$  and  $\sigma$  fixed), (6) is always satisfied. In other words,  $F(\cdot)$  is strongly  
 163 convex for low signal-to-noise ratio, or high temperature in physics parlance.

164 From now on, we always assume  $F(\cdot)$  is strongly convex on  $S^\circ := S \setminus \partial S$ . Next we introduce a  
 165 scalar denoising function, which is just the proximal operator of  $F(\cdot)$ .

166 **Definition 4** (Scalar denoising function). For  $x \in \mathbb{R}$  and  $t > 0$ ,

$$\eta(x, t) := \arg \min_{w \in S} \left\{ \frac{1}{2t} (w - x)^2 + F(w) \right\} \in S^\circ$$

167 Since  $F(\cdot)$  is strongly convex, this one-dimensional optimization has a unique minimizer. Note that  
 168 when  $S = [-1, 1]$ , since  $\lim_{w \rightarrow \pm 1} \frac{\mathrm{d}F}{\mathrm{d}w}(w) = \lim_{w \rightarrow \pm 1} h(w, 1/\sigma^2) \mp \frac{1}{\sigma^2} = \pm\infty$ , the minimum is  
 169 never achieved on the boundary of  $S$ . Similarly, when  $S = \mathbb{R}$ ,  $\lim_{w \rightarrow \pm\infty} \frac{\mathrm{d}F}{\mathrm{d}w}(w) = \pm\infty$ . Therefore,  
 170 the minimum is always achieved at a stationary point. Lastly,  $\eta(0, t) = 0$  if  $\pi$  is symmetric. In fact,  
 171 throughout this paper, we only consider symmetric priors.

Before stating our main result and its implications, we first introduce a two-dimensional optimization problem, which will play a central role in our later discussion,

$$\max_{b \geq 0} \min_{\tau \geq \sigma} \phi(b, \tau) \quad (7)$$

$$\phi(b, \tau) := \frac{b}{2} \left( \frac{\sigma^2}{\tau} + \tau \right) - \frac{1}{2} b^2 + \frac{1}{\alpha} \mathbb{E} \min_{w \in S} \left\{ \frac{b}{2\tau} w^2 - bZw + \sigma^2 F(w + B) - \sigma^2 F(B) \right\} \quad (8)$$

$$F(u) = F_\pi(u, \sigma^2) = G(u, 1/\sigma^2) - \frac{u^2}{2\sigma^2}, \quad (9)$$

where the  $\mathbb{E}$  is taken over  $(B, Z) \sim \pi^* \otimes \mathcal{N}(0, 1)$ . In the next lemma we gather some additional characterizations of this min-max problem.

**Lemma 6.** *The max-min in (7) is achieved at some  $(b^*, \tau^*) \in (0, \infty) \times (\sigma, \infty)$ . In fact,  $b^*$  is unique. In addition,  $(b^*, \tau^*)$  is also a solution to the following fixed point equation,*

$$\begin{aligned} \tau^2 &= \sigma^2 + \frac{1}{\alpha} \mathbb{E} \left[ \left( \eta \left( \tau Z + B, \frac{\tau \sigma^2}{b} \right) - B \right)^2 \right] \\ b &= \tau - \frac{1}{\alpha} \mathbb{E} \left[ Z \cdot \eta \left( \tau Z + B, \frac{\tau \sigma^2}{b} \right) \right] = \tau \left( 1 - \frac{1}{\alpha} \mathbb{E} \left[ \eta' \left( \tau Z + B, \frac{\tau \sigma^2}{b} \right) \right] \right), \end{aligned} \quad (10)$$

where  $\eta'(x, t) := \frac{\partial \eta}{\partial x}(x, t)$ .

**Definition 5.** We use  $\nu^* = \nu_{\pi, \pi^*}^*$  to denote the distribution of  $\left( \eta \left( \tau^* Z + B, \frac{\tau^* \sigma^2}{b^*} \right), B \right)$ , in which  $(B, Z) \sim \pi^* \otimes \mathcal{N}(0, 1)$ . We denote by  $\hat{\nu}$  the empirical distribution of  $\{(\hat{u}_i, \beta_i^*)\}_{i=1}^p$ .

Now we are ready to state our main result, which provides sharp asymptotic characterization of  $\hat{\nu}$ .

**Theorem 1.** *Suppose the max-min problem in (7) has a unique optimizer  $(b^*, \tau^*)$ , or the fixed point equation in (10) has a unique solution  $(b^*, \tau^*)$ . Then for all  $\varepsilon > 0$ , as  $n, p \rightarrow \infty$ ,*

$$\mathbb{P} \left( W_2(\nu^*, \hat{\nu})^2 \geq \varepsilon \right) \rightarrow 0,$$

where  $W_2(\cdot, \cdot)$  stands for order 2 Wasserstein distance.

**Remark 2.** *This result indicates the NMF estimator  $\hat{u}$  should be asymptotically roughly iid among different coordinates, which is different from the NMF distributions being product distributions.*

**Corollary 1.** *Suppose the hidden true signal  $\beta^*$  was a priori sampled iid from a probability distribution  $\pi^*$  with finite second moment. Note that  $\pi^*$  can be different from the prior  $\pi$  that the Bayesian statistician chose to use. In addition, suppose the max-min problem in (7) has a unique optimizer  $(b^*, \tau^*)$ , or the fixed point equation in (10) has a unique solution  $(b^*, \tau^*)$ , then for all  $\varepsilon > 0$ ,*

$$\mathbb{P} \left( W_2(\nu_{\pi, \pi^*}^*, \hat{\nu})^2 \geq \varepsilon \right) \rightarrow 0, \quad \text{as } n, p \rightarrow \infty,$$

in which  $\nu^*$  was defined in Definition 5.

We provide a proof sketch in Section 6 and all the detailed proofs are deferred to the Supplementary Material.

### 3 Log normalizing constant: sub-optimality of NMF

As alluded, as implications of Theorem 1, we develop asymptotics of both  $\log \mathcal{Z}_p^{\text{NMF}}$  and mean square error (MSE) of the NMF point estimator  $\hat{u}$  in terms of  $(b^*, \tau^*)$ .

**Corollary 2 (MSE).** *When conditions of Corollary 1 hold, as  $n, p \rightarrow \infty$ ,*

$$\frac{1}{p} \|\hat{u} - \beta^*\|^2 \xrightarrow{P} \mathbb{E}_{(B, Z) \sim \pi^* \otimes \mathcal{N}(0, 1)} \left[ \left( \eta \left( \tau^* Z + B, \frac{\tau^* \sigma^2}{b^*} \right) - B \right)^2 \right] = \alpha(\tau^{*2} - \sigma^2).$$

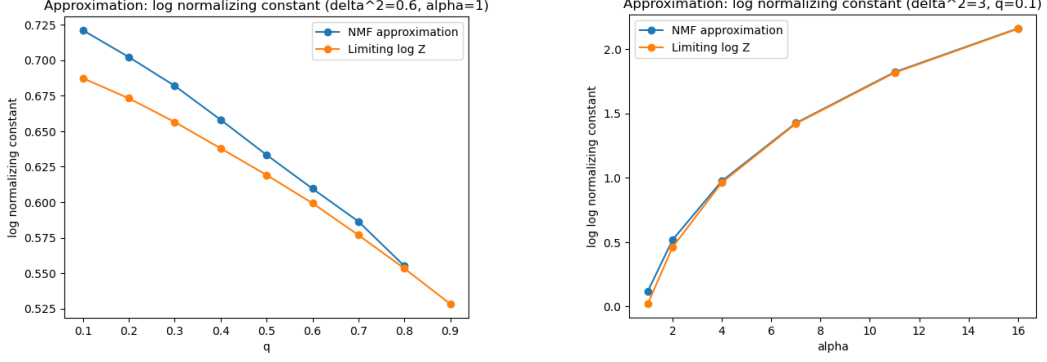

Figure 2: These two figures demonstrate the existence of a gap between  $\lim_{p \rightarrow \infty} (\mathcal{Z}_p)/p$  and  $\lim_{p \rightarrow \infty} (\log \mathcal{Z}_p^{\text{NMF}})/p$  when  $\pi = \pi^*$  is a Gaussian Spike and Slab distribution. The left panel features the observation that the gap gets smaller as  $q$  (prior sparsity) increases, while the right panel shows as  $\alpha := n/p$  gets large, the gap seems to converge to 0, which is consistent with the results established in [14] when  $p = o(n)$ .

**Corollary 3** (Log normalizing constant). *When conditions of Corollary 1 hold, as  $n, p \rightarrow \infty$ ,*

$$-\frac{1}{p} \log \mathcal{Z}_p^{\text{NMF}} = \frac{1}{p} \left[ M_p(\hat{u}) - \sum_{i=1}^p c(0, d_i) \right] \xrightarrow{P} \frac{\alpha b^{*2}}{2\sigma^2} + \mathbb{E}F(\eta(B + \tau^*Z, \tau^*/b^*)) - c(0, 1/\sigma^2).$$

Though all our main theorems and corollaries apply to the case when  $\pi^* \neq \pi$ , from now on, we consider the case of the “nicest” setting, i.e, when assumptions of Corollary 1 are satisfied and in addition  $\pi = \pi^*$ . By doing so, the message we would like to convey is: even if there was no model mismatch at all, NMF is still not gonna be “correct”.

Concentration and limiting values of both the optimal Bayesian mean square error (i.e.  $\mathbb{E}\|\beta - \mathbb{E}[\beta^*|X, y]\|^2/p$ ) and the actual log-normalizing constant were conjectured and rigorously established under additional regularity conditions, which provides us the “correct answers” to compare with. Please see [1, 19]. We also provide statements of these results in the Supplementary Material for completeness.

Please see Figure 2 for numerical evaluations of Corollary 3 which suggest for Gaussian Spike and Slab prior the bound in (4) is not tight. Since in general both  $F(\cdot)$  and  $\eta(\cdot, \cdot)$  lack analytical forms, it is hard to provide universal guarantee on whether (7) has a unique optimizer or the fixed point equation (10) has a unique solution. In fact, our numerical experiments suggest it is possible for (10) to have multiple fixed points. Therefore, how to exactly realize and evaluate the asymptotic predictions in these two corollaries (so as Corollary 4 in the next section) is in general challenging and can only be done in a case by case basis and usually involves numerically solving (10). In light of this observation, we use the Gaussian Spike and Slab prior as defined in Lemma 5 for presentation purpose. Since it is both non-trivial and of practical interests, though we do emphasise the same framework and workflow also apply to other priors as well. With out loss of generality, we also take  $\sigma^2 = 1$ . This choice renders Figure 2, as well as Figure 3 in the next section. Details of how to generate these plots are deferred to the Supplementary Material.

#### 4 Uncertainty quantification: average coverage rate

To study uncertainty quantification properties of NMF approximation, we consider the average coverage rate of symmetric Bayesian credible regions (of level  $1 - \zeta$ ) suggested by the NMF distributions, i.e,  $R_{p,\zeta} := \frac{1}{p} \sum_{i=1}^p \mathbb{1}_{\{\beta_i^* \in [\hat{q}_{i,\zeta/2}, \hat{q}_{i,1-\zeta/2}]\}}$ , where  $\hat{q}_{i,t}$  is the  $t$ -th quantile of  $\pi^{(h(\hat{u}_i, d_i), d_i)}$ . In order to study asymptotic behavior of  $R_{p,\zeta}$ , we define an  $(m(\pi), M(\pi)) \times S \rightarrow \{0, 1\}$  indicator function

$$\psi_\zeta(u_0, \beta_0) = \mathbb{1}_{\left\{ \beta_0 \in \left[ q_{\pi^{(h(u_0, 1/\sigma^2), 1/\sigma^2)}, \zeta/2}, q_{\pi^{(h(u_0, 1/\sigma^2), 1/\sigma^2)}, 1-\zeta/2} \right] \right\}}.$$

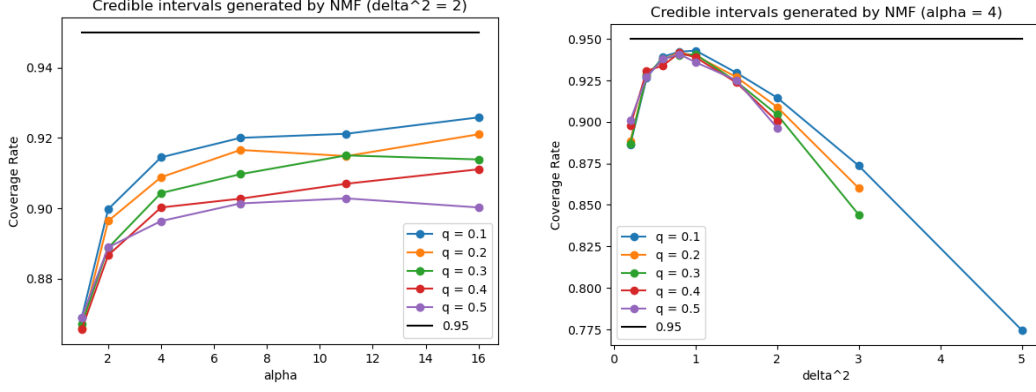

Figure 3: These two figures show that estimated credible regions given by NMF do not achieve the nominal coverage, in this case 95%, when  $\pi = \pi^*$  is a Gaussian Spike and Slab distribution. Recall that  $\alpha = n/p$  and please see Lemma 5 for exact definitions of the hyper-parameters  $q$  and  $\Delta^2$ .

The following corollary of Theorem 1 establishes the asymptotic convergence of  $R_{p,\zeta}$ . Numerically evaluating it for the Gaussian Spike and Slab prior renders Figure 3, which shows NMF credible regions can not achieve the nominal coverage, in this case 95%, and also provide an exhibition of how large the gaps are for different hyper-parameters.

**Corollary 4.** Suppose conditions of Corollary 1 hold. In addition, assume  $\text{support}(\pi) = S$ , equivalently, the quantile function of  $\pi$  is continuous. Then as  $n, p \rightarrow \infty$ ,

$$R_{p,\zeta} \xrightarrow{P} \mathbb{E}_{(B,Z) \sim \pi^* \otimes \mathcal{N}(0,1)} \left[ \psi_\zeta \left( \eta \left( \tau^* Z + B, \frac{\tau^* \sigma^2}{b^*} \right), B \right) \right].$$

On the other hand, based on the asymptotic joint distribution of  $\hat{u}$  and  $\beta^*$  as stated in Corollary 1, we can in fact identify a strategy of constructing asymptotically exact Bayesian credible regions based on  $\hat{u}$ . Let  $q_t(x)$  be the  $t$ -th quantile of conditional distribution of  $B$  given  $\eta(\tau^* Z + B, \tau^* \sigma^2 / b^*) = x$ . This way, the following Corollary ensures  $[q_{\zeta/2}(\hat{u}_i), q_{1-\zeta/2}(\hat{u}_i)]$  is asymptotically of at least  $1 - \zeta$  coverage.

**Corollary 5.** Suppose conditions of Corollary 4 hold, then for any  $\varepsilon > 0$ ,

$$\lim_{p \rightarrow \infty} \mathbb{P} \left( \frac{1}{p} \sum_{i=1}^p \mathbb{1}_{\{\beta_i^* \in [q_{\zeta/2}(\hat{u}_i), q_{1-\zeta/2}(\hat{u}_i)]\}} < 1 - \zeta - \varepsilon \right) = 0.$$

## 5 Extensions and Limitations

We want to be clear about the fact that technically we did not “prove” the sub-optimality of NMF. Instead, we rigorously derived asymptotic characterizations of NMF approximation through solution of a fixed point equation. But this fixed point equation can only be solved numerically on a case-by-case basis and it is not guaranteed to have a unique solution. All our plots are based on iteratively solving the fixed point equation. As a matter of fact, for instance, when  $q$  is close to 1 for the Gaussian Spike and Slab prior we considered, the fixed point equation is clearly not converging to the right fixed point, as shown in the Supplementary Material. It could also just do not converge for very small  $\alpha$ . Nevertheless, all the plots we are showing in the main text are backed by a numerical simulation of using simple gradient decent to optimize the NMF objective for  $n = 8000$ . All in all, it is probably more accurate to say we provided a tool for establishing sub-optimality of NMF for a general class of priors rather than proving it for good.

Another obvious limitation is we can only handle priors that guarantee convexity of the the KL-divergence term in terms of the mean parameter. Though it is indeed a broad class of distributions covering some of most commonly used symmetric priors (e.g. Gaussian, Laplace, and so on), little is known about asymptotic behaviour of NMF when the convexity assumption is violated.

We note that, in theory, in order to carry out the analysis using CGMT, the additive noise  $\epsilon$  as defined in (1) does not have to be Gaussian. Instead, as long as it has log-concave density, the same proof



idea applies, though we intentionally chose to stick with Gaussian noise as it renders much cleaner results and more comprehensive presentation. In addition, we expect some kind of stronger uniform convergence (e.g. uniform in  $\sigma^2$ ) can also be established, which can be crucial for applications like hyper-parameters selection. Please see [13] for an example where results of this flavor were obtained.

## 6 Proof strategy

We give a proof outline of Theorem 1 in this section. More details can be found in the Supplementary Material. Replacing all  $d_i$ 's in  $M_p$  with  $\mathbb{E}d_i = 1/\sigma^2$ , we define  $N_p$  as

$$N_p(u) = \frac{1}{2\sigma^2} \|Y - Xu\|_2^2 + \sum_{i=1}^p \left[ G(u_i, 1/\sigma^2) - \frac{u_i^2}{2\sigma^2} \right] = \frac{1}{2\sigma^2} \|Y - Xu\|_2^2 + \sum_{i=1}^p F(u_i).$$

**Lemma 7.** *Let  $\hat{u}_N := \arg \min_u [N_p(u)]$ . Then for some  $C_s \in \mathbb{R}^+$ , as  $n, p \rightarrow \infty$ ,*

$$\mathbb{P} \left( \frac{1}{p} \max(\|\hat{u}\|^2, \|\hat{u}_N\|^2) > (1 + C_s)s_2 \right) \rightarrow 0.$$

**Lemma 8.** *For any  $\varepsilon > 0$ , as  $n, p \rightarrow \infty$ , with  $C_s$  as defined in Lemma 7,*

$$\mathbb{P} \left( \frac{1}{p} \sup_{\|u\|^2/p \leq (1+C_s)s_2} \left| \sum_{i=1}^p \left[ G(u_i, 1/\sigma^2) - \frac{u_i^2}{2\sigma^2} \right] - \left[ G(u_i, d_i) - \frac{d_i u_i^2}{2} \right] \right| > \varepsilon \right) \rightarrow 0. \quad (11)$$

According to Lemma 8 and 7,  $N_p(\cdot)$  and  $M_p(\cdot)$  are with high probability uniformly close. Thus from now on, we focus on using Gaussian comparison to analyse  $\hat{u}_N$  and  $N_p(\hat{u}_N)$  in place of  $\hat{u}$  and  $M_p(\hat{u})$ . Since  $F(\cdot)$  is strongly convex,  $\hat{w} := \hat{u}_N - \beta^*$  is the unique minimizer of

$$L(w) := \frac{1}{2n} \|Xw - \epsilon\|^2 + \frac{\sigma^2}{n} \sum_{i=1}^p (F(w_i + \beta_i^*) - F(\beta_i^*)).$$

By introducing a dual vector  $s$ , we get

$$\min_w L(w) = \min_{w \in \mathbb{R}^p} \max_{s \in \mathbb{R}^n} \frac{1}{n} s^T (Xw - \epsilon) - \frac{1}{2n} \|s\|^2 + \frac{\sigma^2}{n} \sum_{i=1}^p (F(w_i + \beta_i^*) - F(\beta_i^*)).$$

By CGMT (see for instance [21, Theorem 3.3.1] or [13, Theorem 5.1]), it suffices now to study

$$\min_{w \in \mathbb{R}^p} \max_{s \in \mathbb{R}^n} \frac{1}{n^{3/2}} \|s\| g^T w + \frac{1}{n^{3/2}} \|w\| h^T u - \frac{1}{n} s^T \epsilon - \frac{1}{2n} \|s\|^2 + \frac{\sigma^2}{n} \sum_{i=1}^p (F(w_i + \beta_i^*) - F(\beta_i^*))$$

where  $g \sim \mathcal{N}(0, I_p)$  and  $h \sim \mathcal{N}(0, I_n)$  and they are independent. Note that the min and max can be flipped due to convex-concavity. By optimizing with respect to  $s/\|s\|$  and introducing

$$\sqrt{\frac{\|w\|^2}{n} + \sigma^2} = \min_{\tau \geq \sigma} \left\{ \frac{\|w\|^2 + \sigma^2}{2\tau} + \frac{\tau}{2} \right\}, \text{ it can be further reduced to}$$

$$\max_{b \geq 0} \min_{\tau \geq \sigma} \frac{b}{2} \left( \frac{\sigma^2}{\tau} + \tau \right) - \frac{b^2}{2} + \frac{1}{\alpha} \min_{w \in \mathbb{R}^p} \sum_{i=1}^p \left[ \frac{1}{p} \left\{ \frac{b}{2\tau} w_i^2 - b g_i w_i + \sigma^2 F(w_i + \beta_i^*) - \sigma^2 F(\beta_i^*) \right\} \right].$$

Under minor regularity conditions, as  $n, p \rightarrow \infty$ , it converges to

$$\max_{b \geq 0} \min_{\tau \geq \sigma} \frac{b}{2} \left( \frac{\sigma^2}{\tau} + \tau \right) - \frac{b^2}{2} + \frac{1}{\alpha} \mathbb{E}_{B, Z} \min_{w \in \mathbb{R}} \left\{ \frac{b}{2\tau} w^2 - b Z w + \sigma^2 F(w + B) - \sigma^2 F(B) \right\}$$

with  $(B, Z) \sim \pi^* \otimes \mathcal{N}(0, 1)$ , which is how we got  $\phi(\cdot, \cdot)$  as in (7). Further more, by differentiating  $\phi(b, \tau)$  with respect to  $\tau$  and  $b$ , we arrive at the fixed point equation in Lemma 6. Last but not least, note that  $\arg \min_w \{w^2 - b Z w + \sigma^2 F(w + B)\} = \eta(\tau Z + B, \tau \sigma^2/b) - B$ , which explains why the joint empirical distribution of  $(\hat{w}_i, \beta_i^*)$ 's converges to the law of  $(\eta(\tau^* Z + B, \tau^* \sigma^2/b^*) - B, B)$ . Finally, we note that similar proof arguments were made in [13, 21].

## References

- [1] Jean Barbier et al. “Mutual information and optimality of approximate message-passing in random linear estimation”. In: *IEEE Transactions on Information Theory* 66.7 (2020), pp. 4270–4303.
- [2] David M Blei, Alp Kucukelbir, and Jon D McAuliffe. “Variational inference: A review for statisticians”. In: *Journal of the American statistical Association* 112.518 (2017), pp. 859–877.
- [3] Richard S Ellis and James L Monroe. “A simple proof of the GHS and further inequalities”. In: *Communications in Mathematical Physics* 41.1 (1975), pp. 33–38.
- [4] Richard S Ellis, James L Monroe, and Charles M Newman. “The GHS and other correlation inequalities for a class of even ferromagnets”. In: *Communications in Mathematical Physics* 46.2 (1976), pp. 167–182.
- [5] Behrooz Ghorbani, Hamid Javadi, and Andrea Montanari. “An instability in variational inference for topic models”. In: *International conference on machine learning*. PMLR. 2019, pp. 2221–2231.
- [6] Ryan J Giordano, Tamara Broderick, and Michael I Jordan. “Linear response methods for accurate covariance estimates from mean field variational Bayes”. In: *Advances in neural information processing systems* 28 (2015).
- [7] Yehoram Gordon. “Some inequalities for Gaussian processes and applications”. In: *Israel Journal of Mathematics* 50 (1985), pp. 265–289.
- [8] Peter Hall et al. “Asymptotic normality and valid inference for Gaussian variational approximation”. In: (2011).
- [9] Qiyang Han and Yandi Shen. “Universality of regularized regression estimators in high dimensions”. In: *arXiv preprint arXiv:2206.07936* (2022).
- [10] Anya Katsevich and Philippe Rigollet. “On the Approximation Accuracy of Gaussian Variational Inference”. In: *arXiv preprint arXiv:2301.02168* (2023).
- [11] Florent Krzakala et al. “Variational free energies for compressed sensing”. In: *2014 IEEE International Symposium on Information Theory*. IEEE. 2014, pp. 1499–1503.
- [12] Clare A McGrory and DM237087605559631 Titterton. “Variational approximations in Bayesian model selection for finite mixture distributions”. In: *Computational Statistics & Data Analysis* 51.11 (2007), pp. 5352–5367.
- [13] Léo Miolane and Andrea Montanari. “The distribution of the lasso: Uniform control over sparse balls and adaptive parameter tuning”. In: *The Annals of Statistics* 49.4 (2021), pp. 2313–2335.
- [14] Sumit Mukherjee and Subhabrata Sen. “Variational Inference in high-dimensional linear regression”. In: *arXiv preprint arXiv:2104.12232* (2021).
- [15] J v. Neumann. “Zur theorie der gesellschaftsspiele”. In: *Mathematische annalen* 100.1 (1928), pp. 295–320.
- [16] Debdeep Pati, Anirban Bhattacharya, and Yun Yang. “On statistical optimality of variational Bayes”. In: *International Conference on Artificial Intelligence and Statistics*. PMLR. 2018, pp. 1579–1588.
- [17] Jiaze Qiu and Subhabrata Sen. “The TAP free energy for high-dimensional linear regression”. In: *arXiv preprint arXiv:2203.07539* (2022).
- [18] Kolyan Ray, Botond Szabó, and Gabriel Clara. “Spike and slab variational Bayes for high dimensional logistic regression”. In: *Advances in Neural Information Processing Systems* 33 (2020), pp. 14423–14434.
- [19] Galen Reeves and Henry D Pfister. “The replica-symmetric prediction for compressed sensing with Gaussian matrices is exact”. In: *2016 IEEE International Symposium on Information Theory (ISIT)*. IEEE. 2016, pp. 665–669.
- [20] Mihailo Stojnic. “A framework to characterize performance of lasso algorithms”. In: *arXiv preprint arXiv:1303.7291* (2013).
- [21] Christos Thrampoulidis. “Recovering structured signals in high dimensions via non-smooth convex optimization: Precise performance analysis”. PhD thesis. California Institute of Technology, 2016.
- [22] Christos Thrampoulidis, Ehsan Abbasi, and Babak Hassibi. “Precise error analysis of regularized  $M$ -estimators in high dimensions”. In: *IEEE Transactions on Information Theory* 64.8 (2018), pp. 5592–5628.

- 335 [23] Christos Thrampoulidis, Samet Oymak, and Babak Hassibi. “Regularized linear regression: A  
336 precise analysis of the estimation error”. In: *Conference on Learning Theory*. PMLR. 2015,  
337 pp. 1683–1709.
- 338 [24] Roman Vershynin. “Introduction to the non-asymptotic analysis of random matrices”. In: *arXiv  
339 preprint arXiv:1011.3027* (2010).
- 340 [25] Martin J Wainwright and Michael Irwin Jordan. *Graphical models, exponential families, and  
341 variational inference*. Now Publishers Inc, 2008.
- 342 [26] Fengshuo Zhang and Chao Gao. “Convergence rates of variational posterior distributions”. In:  
343 (2020).

345 **A Technical lemmas and basic facts**

346 **Lemma 9.** Let  $\dot{c}(h, d) := \frac{\partial c}{\partial h}(h, d)$  and  $\ddot{c}(h, d) := \frac{\partial^2 c}{\partial h^2}(h, d)$ . We have, for  $u \in (m(\pi), M(\pi))$  and  
 347  $d \in \mathbb{R}$ ,

$$\begin{aligned} \frac{\partial G}{\partial u}(u, d) &= h(u, d), \quad \frac{\partial G}{\partial d} = \frac{1}{2} \int_S z^2 d\pi^{(h(u, d), d)}(z) - \frac{1}{2} \int_S z^2 d\pi^{(0, d)}(z). \\ \frac{\partial^2 G}{\partial^2 u}(u, d) &= \frac{1}{\ddot{c}(h(u, d), d)} = \frac{1}{\text{Var}_{X \sim \pi^{(h(u, d), d)}}(X)} > 0. \end{aligned}$$

348 **Lemma 10** (von Neumann's minimax theorem, [15]). Let  $S_w \subset \mathbb{R}^n$  and  $S_s \subset \mathbb{R}^m$  be compact  
 349 convex sets. If  $f : S_w \times S_s \rightarrow \mathbb{R}$  is a continuous function that is convex concave, i.e.  $f(\cdot, s) : S_w \rightarrow \mathbb{R}$   
 350 is convex for fixed  $s$ , and  $f(w, \cdot) : S_s \rightarrow \mathbb{R}$  is concave for fixed  $w$ . Then we have that

$$\min_{w \in S_w} \max_{s \in S_s} f(w, s) = \max_{s \in S_s} \min_{w \in S_w} f(w, s).$$

351 **Theorem 2** (CGMT, [23, 21, 13]). Let  $S_w \subset \mathbb{R}^p$  and  $S_s \subset \mathbb{R}^n$  be two compact sets and let  
 352  $Q : S_w \times S_s \rightarrow \mathbb{R}$  be a continuous function. Let  $G = (G_{ij})_{1 \leq i \leq n, 1 \leq j \leq p} \stackrel{iid}{\sim} \mathcal{N}(0, 1)$ ,  $g \sim \mathcal{N}(0, I_p)$ ,  
 353  $h \sim \mathcal{N}(0, I_n)$  be independent standard Gaussian vectors. Denote

$$\begin{aligned} \Phi(G) &= \min_{w \in S_w} \max_{s \in S_s} s^T G w + Q(w, s), \\ \Psi(g, h) &= \min_{w \in S_w} \max_{s \in S_s} \|s\| g^T w + \|w\| h^T s + Q(w, s). \end{aligned}$$

354 Then we have

355 1. For all  $t \in \mathbb{R}$ ,

$$\mathbb{P}(\Phi(G) \leq t) \leq 2\mathbb{P}(\Psi(g, h) \leq t).$$

356 2. If both  $S_w$  and  $S_s$  are convex and if  $Q(\cdot, \cdot)$  is convex concave, then for all  $t \in \mathbb{R}$ ,

$$\mathbb{P}(\Phi(G) \geq t) \leq 2\mathbb{P}(\Psi(g, h) \geq t).$$

357 The most important message of this theorem is essentially whenever  $\Psi(g, h)$  concentrates around  
 358 certain value  $t$ ,  $\Phi(G)$  will also concentrate around  $t$ , assuming  $Q(\cdot, \cdot)$  is convex concave.

359 **B Proofs**

360 Proof of Lemma 1 and 9 can be found in for instance [14].

361 **B.1 Convexity of  $F(\cdot)$**

362 *Proof of Lemma 2.* We only prove part (1) here, as proof of part (2) is almost exactly the same. For  
 363 any  $h, d \in \mathbb{R}^+$ , by GHS inequality [4, Equation 1.4],

$$\frac{\partial [\text{Var}_{B \sim \pi^{(h, d)}}(B)]}{\partial h} = \mathbb{E}[B^3] - 3\mathbb{E}B\mathbb{E}[B^2] + 2(\mathbb{E}B)^3 \stackrel{\text{GHS}}{\leq} 0,$$

364 Together with the assumption that  $V$  is even, we have for any  $h \in \mathbb{R}$  and  $d \geq 0$ ,

$$\text{Var}_{B \sim \pi^{(h, d)}}(B) \leq \text{Var}_{B \sim \pi^{(0, d)}}(B).$$

Consider now a family of parametric distributions  $\{\mathcal{P}_\theta : \theta \geq 0\}$  as a generalization of  $\pi^{(0, d)}$ , with

$$\frac{d\mathcal{P}_\theta}{dx}(x) \propto \exp(-\theta V(x)) \exp(-dx^2/2).$$

365 Note that  $\mathcal{P}_{\theta=1} = \pi^{(0,d)}$ . Since  $V(\cdot)$  is even and increasing,

$$\begin{aligned} \text{Var}_{B \sim \pi^{(0,d)}}(B) &= \text{Var}_{S \sim \mathcal{P}_{\theta=1}}(S) \leq \text{Var}_{S \sim \mathcal{P}_{\theta=0}}(S) \\ &= \frac{\int_{\mathbb{R}} z^2 e^{-dz^2/2} dz}{\int_{\mathbb{R}} e^{-dz^2/2} dz} \\ &= \frac{1}{d} \frac{\int_{\mathbb{R}} z^2 e^{-z^2/2} dz}{\int_{\mathbb{R}} e^{-z^2/2} dz} \\ &\leq \frac{1}{d} \text{Var}_{S \sim \mathcal{N}(0,1)}(S) = \frac{1}{d}, \end{aligned}$$

366 which ensures  $\text{Var}_{B \sim \pi^{(h(u,1/\sigma^2),1/\sigma^2)}}(B) \leq \sigma^2$  and therefore  $\frac{d^2 F}{du^2}(u) \geq 0$  by (12). Note that as  
 367 long as  $\pi$  is a valid probability distribution,  $F(\cdot)$  is not only convex, but always strongly convex, as  
 368  $\text{Var}_{B \sim \pi^{(h(u,1/\sigma^2),1/\sigma^2)}}(B) = \sigma^2$  if and only if  $V(\cdot)$  is a constant function and the support of  $\pi$  is the  
 369 whole real line.  $\square$

370 The same proof idea also applies to Lemma 3 and therefore we omit its proof to avoid redundancy.

371 *Proof of Lemma 4.* The conclusion follows by noting

$$\frac{d^2 F}{du^2}(u) = \frac{1}{\text{Var}_{B \sim \pi^{(h(u,1/\sigma^2),1/\sigma^2)}}(B)} - \frac{1}{\sigma^2} > 0, \quad (12)$$

372 as  $\pi^{(h,d)}$  is a distribution on  $[-a, a]$  and thus its variance is at most  $a^2$ , which is assumed to be  
 373 smaller than  $\sigma^2$ .  $\square$

374 For Lemma 5, since  $\text{Var}_{B \sim \pi^{(h,d)}}(B)$  can be analytically computed for the Gaussian Spike and Slab  
 375 prior, its proof is nothing but elementary calculation and then checking for (12).

## 376 B.2 Replacing $d_i$ with $\mathbb{E}d_i$

377 *Proof of Lemma 7.* We focus on only  $\|\hat{u}\|$  since almost exactly the same argument also applies to  
 378  $\hat{u}_N$ . We first collect a few high probability claims, proofs of which are just direct applications of  
 379 basic standard random matrix results (see for instance [24]).

- 380 1. There exist positive constants  $C_1$  and  $C_2$  (only depend on  $\alpha$ ), such that for any  $\varepsilon > 0$ ,  
 381  $S_1 := \{|\lambda_{\max}(X^T X) - C_1| < \varepsilon\}$  and  $S_2 := \{|\lambda_{\min}(X^T X) - C_2| < \varepsilon\}$  are both of high  
 382 probability.
- 383 2. Recall the additive noise  $\epsilon \sim \mathcal{N}(0, \sigma^2 I_n)$ . For any  $\varepsilon > 0$ ,  $S_3 := \{|\|\epsilon\|^2/n - \sigma^2| < \varepsilon\}$  is of  
 384 high probability.
- 385 3. For any  $\varepsilon > 0$ ,  $S_4 = \{|\epsilon^T X \beta^*/p| < \varepsilon\}$  is of high probability.

386 Let  $S_0 = S_1 \cap S_2 \cap S_3 \cap S_4$ , which is again an event of approaching 1 probability. Note that since  
 387 the empirical distribution of  $\beta_i^*$ 's converge in  $L_2$  to  $\pi^*$ , one has  $\|\beta^*\|^2 < 1.01ps_2$  for large enough  $p$ .  
 388 When  $S_0$  happens, if  $\|u\|^2/p > (1 + C_s)s_2$  (with  $C_s > 0$  to be chosen later, but large enough such  
 389 that  $\|Xu\| > \|Y\|$ ),

$$\begin{aligned} N_p(u) &\geq \frac{1}{2\sigma^2} \|Y - Xu\|^2 \geq \frac{1}{2\sigma^2} (\|Xu\| - \|Y\|)^2 \geq \frac{p}{2\sigma^2} \left[ \sqrt{(C_2 - \varepsilon)(1 + C_s)s_2} - \|X\beta^* + \epsilon\|/p \right]^2 \\ &\geq \frac{p}{2\sigma^2} \left[ \sqrt{(C_2 - \varepsilon)(1 + C_s)s_2} - \sqrt{2(C_1 + \varepsilon) \cdot 2s_2 + 2\alpha(\sigma^2 + \epsilon)} \right]^2. \end{aligned}$$

390 On the other hand,

$$N_p(\vec{0}) = \frac{1}{2\sigma^2} \|Y\|^2 \leq \frac{p}{2\sigma^2} [(C_1\varepsilon) \cdot 2ps_2 + \alpha(\sigma^2 - \varepsilon) + 2\varepsilon].$$

391 Upon  $C_s$  being large enough, we have  $N_p(u) > N_p(\vec{0})$  for any  $u$  such that  $\|u\|^2/p > (1 + C_s)s_2$ .  
 392 Therefore,  $\|\hat{u}_N\|^2/p < (1 + C_2)s_2$  on  $S_0$ .  $\square$

393 *Proof of Lemma 8.* If  $S = [-1, 1]$ , by Lemma 9,  $\left| \frac{\partial G(u, d)}{\partial d}(u, d) \right| \leq \frac{1}{2}$  for any  $u, d$ , thus

$$\begin{aligned} \text{LHS of (11)} &\leq \sup_u \left[ \sum_{i=1}^p |G(u_i, d_i) - G(u_i, 1/\sigma^2)| + \sum_{i=1}^p \left| \frac{u_i^2}{2\sigma^2} - \frac{d_i u_i^2}{2} \right| \right] \\ &\leq \sup_u \left[ \sum_{i=1}^p \left| \frac{\partial G(u, d)}{\partial d}(u_i, 1/\sigma^2)(d_i - 1/\sigma^2) \right| \right] + \frac{1}{2} \sum_{i=1}^p |d_i - 1/\sigma^2| \\ &\leq \sum_{i=1}^p \left| d_i - \frac{1}{\sigma^2} \right|. \end{aligned}$$

394 Since  $X_{ji}$ 's are *iid* with variance  $1/n$ , we know  $\mathbb{E}d_i = \frac{1}{\sigma^2} \mathbb{E} \left[ \sum_{j=1}^n X_{ji}^2 \right] = \frac{1}{\sigma^2}$ ,  $d_i \xrightarrow{n \rightarrow \infty} \frac{1}{\sigma^2}$ , and all  
395  $d_i$ 's are *iid*, which guarantee RHS of the previous display goes to 0 in probability as  $n, p \rightarrow \infty$ . On  
396 the other hand, if  $S = \mathbb{R}$ , note that for any  $\delta \in (0, 1/(2\sigma^2))$ ,  $\mathbb{P}(\max_{1 \leq i \leq p} |d_i - 1/\sigma^2| > \delta) \rightarrow 0$   
397 as  $n, p \rightarrow \infty$ . In addition, when  $\max_{1 \leq i \leq p} |d_i - 1/\sigma^2| \leq \delta$  is true, which is of approaching 1  
398 probability,

$$\begin{aligned} \frac{1}{p} \cdot \text{LHS of (11)} &\leq \sup_{u: \|u\|/p < (1+C_s)s_2} \left[ \sum_{i=1}^p |G(u_i, d_i) - G(u_i, 1/\sigma^2)| + \sum_{i=1}^p \left| \frac{u_i^2}{2\sigma^2} - \frac{d_i u_i^2}{2} \right| \right] \\ &\leq \frac{1}{p} \cdot \sup_{u: \|u\|/p < (1+C_s)s_2} \left[ \sum_{i=1}^p \left| \frac{\partial G(u, d)}{\partial d}(u_i, 1/\sigma^2 + \delta_i)(d_i - 1/\sigma^2) \right| \right] + \frac{1}{2} \sum_{i=1}^p |d_i - 1/\sigma^2| u_i^2, \end{aligned}$$

399 where  $\delta_i \in (\min(0, d_i - 1/\sigma^2), \max(0, d_i - 1/\sigma^2))$ . By Lemma 9, it is further smaller than

$$\frac{1}{p} \cdot \sup_{u: \|u\|/p < (1+C_s)s_2} \left\{ \frac{1}{2} \sum_{i=1}^p \left| d_i - \frac{1}{\sigma^2} \right| \cdot [\text{Var}_{X \sim \pi(h(u_i, 1/\sigma^2 + \delta_i), 1/\sigma^2)}(X) + u_i^2 + \text{Var}_{X \sim \pi(0, 1/\sigma^2 + \delta_i)}(X) + u_i^2] \right\}.$$

400 Lastly, note that when conditions of one of Lemma 2, 3, 4 and 5 are true, for  $\tilde{d}$  close enough to  $1/\sigma^2$ ,  
401 we have  $\text{Var}_{X \sim \pi(\tilde{h}, \tilde{d})}(X) < 2\sigma^2$  for any  $\tilde{h} \in \mathbb{R}$ . Therefore upon choosing small enough  $\delta$  such that  
402 all  $d_i$ 's are close enough to  $1/\sigma^2$ , the display above is controlled by

$$\begin{aligned} &\frac{1}{p} \cdot \sup_{u: \|u\|/p < 2s_2} \left\{ \frac{1}{2} \sum_{i=1}^p \left[ \left| d_i - \frac{1}{\sigma^2} \right| \cdot (4\sigma^2 + 2u_i^2) \right] \right\} \\ &\leq \max_{1 \leq i \leq p} |d_i - 1/\sigma^2| \cdot \sup_{u: \|u\|/p < 2s_2} \left[ 4\sigma^2 + \frac{\|u\|^2}{p} \right] \\ &\leq \delta \cdot (4\sigma^2 + (1 + C_s)s_2), \end{aligned}$$

403 Lastly, further requiring  $\delta < \frac{\varepsilon}{4\sigma^2 + (1+C_s)s_2}$  renders Lemma 8.  $\square$

### 404 B.3 Regarding the fixed point equation

405 *Proof of Lemma 6.* First of all, recall the definition of  $\phi(\cdot, \cdot)$  in (8),

$$\frac{\partial \phi}{\partial b}(b, \tau) = \frac{1}{2}(\sigma^2/\tau + \tau) - b - \frac{\tau}{2\alpha} + \frac{1}{2\tau\alpha} \mathbb{E}[(\tau Z + B - \eta(\tau Z + B, \tau\sigma^2/b))^2].$$

406 Note that for any fixed  $x$ ,  $|x - \eta(x, t)|$  is always strictly increasing with respect to  $t$ , we have

$$\frac{\partial \{ \mathbb{E}[(\tau Z + B - \eta(\tau Z + B, \tau\sigma^2/b))^2] \}}{\partial b} < 0,$$

407 which further leads to

$$\frac{\partial^2 \phi}{\partial b^2}(b, \tau) < -1, \quad \forall b, \tau.$$

408 Therefore, for any fixed  $\tau$ ,  $\phi(\cdot, \tau)$  is 1-strongly concave. Define  $\psi(b) := \min_{\tau \geq \sigma} \phi(b, \tau)$ . Since  $\psi(\cdot)$   
409 is the minimum of a collection of 1-strongly concave functions, it is 1-strongly concave itself and

410 must have a unique maximizer  $b^*$  over  $[0, \infty)$ . In addition, by definition of  $\eta$ ,  $\lim_{t \rightarrow \infty} \eta(x, t) = 0$ ,  
 411 dominated convergence theorem gives

$$\lim_{b \rightarrow 0^+} \mathbb{E} [(\tau Z + B - \eta(\tau Z + B, \tau \sigma^2/b))^2] = \mathbb{E} [(\tau Z + B)^2] = \tau^2 + \mathbb{E}[B^2].$$

412 Therefore for any fixed  $\tau$ ,

$$\liminf_{b \rightarrow 0} \frac{\partial \phi}{\partial b}(b, \tau) = \frac{1}{2}(\sigma^2/\tau + \tau) + \frac{\mathbb{E}[B^2]}{2\tau\alpha} > 0.$$

413 Together with Lemma 11 and continuity of  $\phi(\cdot, \cdot)$ , it ensures  $b^* \neq 0$ . On the other hand, for any  
 414  $b > 0$ ,

$$\begin{aligned} \frac{\partial \phi}{\partial \tau}(b, \tau) &= \frac{b}{2\tau^2} \left[ \tau^2 - \left( \sigma^2 + \frac{1}{\alpha} \mathbb{E} \left[ (\eta(\tau Z + B, \tau \sigma^2/b) - B)^2 \right] \right) \right], \\ \frac{\partial \phi}{\partial \tau}(b, \tau = \sigma) &< 0. \end{aligned}$$

415 Together with Lemma 11, we have  $\min_{\tau \geq \sigma} \phi(b^*, \tau)$  has at least one minimizer  $\tau^* \in (\sigma, \infty)$ . Finally,  
 416 since  $b^*$  and  $\tau^*$  are not on the boundary, we have  $\frac{\partial \phi}{\partial b}(b^*, \tau^*) = \frac{\partial \phi}{\partial \tau}(b^*, \tau^*) = 0$ , which gives rise to  
 417 the fixed point equation as in (10).  $\square$

418 **Lemma 11.** Recall the definition of  $\phi$  in (8). For any fixed  $b \in (0, \infty)$ ,

$$\lim_{\tau \rightarrow \infty} \phi(b, \tau) = \infty.$$

419 Therefore,  $\min_{\tau} \phi(b, \tau)$  admits at least one minimizer.

420 *Proof.* Since  $\mathbb{E}[B^2] = s_2 < \infty$ ,  $\mathbb{E} \min_{w \in S} \left\{ \frac{b}{2\tau} w^2 - bZw + \sigma^2 F(w + B) - \sigma^2 F(B) \right\}$  is decreas-  
 421 ing in  $\tau$  and always finite for any  $(b, \tau) \in (0, \infty) \times [\sigma, \infty)$ . Therefore  $\lim_{\tau \rightarrow \infty} \phi(b, \tau) = \infty$ .  $\square$

## 422 B.4 Proof of the main results

423 We devote this subsection to proving Theorem 1, while we note Corollary 1, 2, 3, 4 and 5 are all  
 424 direct consequences of it. We prove Theorem 1 first while introducing some necessary lemmas along  
 425 the way. Then we prove these lemmas at the end of this subsection. Throughout this subsection,  
 426 whenever the optimization domains for  $w$  and  $s$  are omitted, they are understood to be  $\mathbb{R}^p$  and  $\mathbb{R}^n$   
 427 respectively. We use  $\hat{\nu}$  to denote empirical distribution in general.

428 Since  $F(\cdot)$  is strongly convex,  $\hat{w} := \hat{u}_N - \beta^*$  is the unique minimizer of

$$L(w) := \frac{1}{2n} \|Xw - \epsilon\|^2 + \frac{\sigma^2}{n} \sum_{i=1}^p (F(w_i + \beta_i^*) - F(\beta_i^*))$$

429 By introducing a dual vector  $s$ , we get

$$\min_w L(w) = \min_w \max_{s \in \mathbb{R}^n} \frac{1}{n} s^T (Xw - \epsilon) - \frac{1}{2n} \|s\|^2 + \frac{\sigma^2}{n} \sum_{i=1}^p (F(w_i + \beta_i^*) - F(\beta_i^*)) := \min_w \max_s \Phi_X(w, s)$$

430 Following the recipe in Theorem 2, we define

$$\Psi_{g,h}(w, s) := \frac{1}{n^{3/2}} \|s\| g^T w + \frac{1}{n^{3/2}} \|w\| h^T u - \frac{1}{n} s^T \epsilon - \frac{1}{2n} \|s\|^2 + \frac{\sigma^2}{n} \sum_{i=1}^p (F(w_i + \beta_i^*) - F(\beta_i^*)),$$

431 where  $g \sim \mathcal{N}(0, I_p)$  and  $h \sim \mathcal{N}(0, I_n)$  and they are independent. Note that with a deliberate abuse  
 432 of notations, we use  $\Phi$  and  $\Psi$  to denote these two functions to indicate their resemblance to those in  
 433 the statement of Theorem 2. By Theorem 2, it suffices now to study  $\min_w \max_s \Psi_{g,h}(w, s)$  in place  
 434 of  $\min_w \max_s \Phi_X(w, s)$ , which is made rigorous by the following lemma.

435 **Lemma 12.** Let  $D$  be any close set.

436 1. We have for all  $t \in \mathbb{R}$

$$\mathbb{P} \left( \min_{w \in D} \max_s \Phi_X(w, s) \leq t \right) \leq 2\mathbb{P} \left( \min_{w \in D} \max_s \Psi_{g,h}(w, s) \leq t \right).$$

437 2. If  $D$  is in addition convex, then we have for all  $t \in \mathbb{R}$

$$\mathbb{P} \left( \min_{w \in D} \max_s \Phi_X(w, s) \geq t \right) \leq 2\mathbb{P} \left( \min_{w \in D} \max_s \Psi_{g,h}(w, s) \geq t \right).$$

438 Due to strong convexity,  $\hat{w}_\Psi := \arg \min_w \max_s \Psi_{g,h}(w, s)$  always exists and is unique. Note that  
 439 the min and max can be flipped due to convex-concavity (Lemma 10). By optimizing with respect to  
 440  $s/\|s\|$  and introducing

$$\sqrt{\frac{\|w\|^2}{n} + \sigma^2} = \min_{\tau \geq \sigma} \left\{ \frac{\frac{\|w\|^2}{n} + \sigma^2}{2\tau} + \frac{\tau}{2} \right\},$$

441  $\min_w \max_s \Psi_{g,h}(w, s)$  can be further reduced to

$$\begin{aligned} & \max_{b \geq 0} \min_{\tau \geq \sigma} \Gamma_{g,h}(b, \tau) \\ \Gamma_{g,h}(b, \tau) &:= \frac{b}{2} \left( \frac{\sigma^2}{\tau} + \tau \right) - \frac{b^2}{2} + \frac{1}{\alpha} \min_{w \in \mathbb{R}^p} \sum_{i=1}^p \left[ \frac{1}{p} \left\{ \frac{b}{2\tau} w_i^2 - b g_i w_i + \sigma^2 F(w_i + \beta_i^*) - \sigma^2 F(\beta_i^*) \right\} \right], \end{aligned}$$

442 in the sense that (1) the optimizers  $\hat{w}_\Psi$  and  $\hat{w}_\Gamma$  are close, i.e, for any  $\kappa > 0$ ,

$$\mathbb{P} \left( \frac{1}{p} \|\hat{w}_\Psi - \hat{w}_\Gamma\|^2 > \kappa \right) \rightarrow 0, \quad (13)$$

443 and (2) the optimum values are preserved with arbitrarily small error with high probab-  
 444 ility. The next lemma ensures empirical distribution of  $(\hat{w}_\Psi, \beta^*)$  is close to the distribution of  
 445  $\left( \eta \left( \tau^* Z + B, \frac{\tau^* \sigma^2}{b^*} \right) - B, B \right)$ , which we denote as  $\nu_{(w^*, \pi^*)}^*$ , where  $(B, Z) \sim \pi^* \otimes \mathcal{N}(0, 1)$ .

446 **Lemma 13.** Suppose all conditions of Theorem 1 are satisfied. For any  $\varepsilon > 0$ , there exists  $C(\varepsilon) \in$   
 447  $(0, \varepsilon)$ , such that as  $p, n \rightarrow \infty$ ,

$$\mathbb{P} \left( \exists \tilde{w} \in \mathbb{R}^p \text{ such that } W_2 \left( \hat{\nu}_{(\tilde{w}, \beta^*)}, \nu_{(w^*, \pi^*)}^* \right)^2 \geq \varepsilon \text{ and } \max_s \Psi_{g,h}(\tilde{w}, s) < \min_w \max_s \Psi_{g,h}(w, s) + C(\varepsilon) \right) \rightarrow 0.$$

448 In the meantime,

$$\min_w \max_s \Psi_{g,h}(w, s) \xrightarrow{P} \frac{\alpha b^{*2}}{2\sigma^2} + \mathbb{E}F(\eta(B + \tau^* Z, \tau^*/b^*)).$$

449 Build upon these lemmas, we now prove the empirical distribution of  $(\hat{u}_N, \beta^*) = (\beta^* + \hat{w}, \beta^*)$  is close  
 450 to  $\nu^*$  as defined in Definition 5. For  $\varepsilon > 0$ , define  $D_\varepsilon = \left\{ w \in \mathbb{R}^p : W_2 \left( \hat{\nu}_{(w, \beta^*)}, \nu_{(w^*, \pi^*)}^* \right)^2 \geq \varepsilon \right\}$ .

451 In order to establish

$$\mathbb{P} \left( W_2(\hat{\nu}_{(\hat{w}, \beta^*)}, \nu_{(w^*, \pi^*)}^*) \right) \rightarrow 0,$$

452 it suffices to show with high probability for some  $\delta(\varepsilon) > 0$ ,

$$\min_{w \in D_\varepsilon} \max_s \Phi_X(w, s) \geq \min_{w \in \mathbb{R}^p} \max_s \Phi_X(w, s) + \delta(\varepsilon). \quad (14)$$

453 On the one hand, by applying both (1) and (2) of Lemma 12 to  $D = \mathbb{R}^p$ , together with Lemma 13,  
 454 we have

$$\lim_{n, p \rightarrow \infty} \min_w \max_s \Phi_X(w, s) = \lim_{n, p \rightarrow \infty} \min_w \max_s \Psi_{g,h}(w, s) = \frac{\alpha b^{*2}}{2\sigma^2} + \mathbb{E}F(\eta(B + \tau^* Z, \tau^*/b^*)),$$

455 where the “lim” is understood to be convergence in probability. It further leads to

$$\mathbb{P} \left( \left| \min_w \max_s \Phi_X(w, s) - \min_w \max_s \Psi_{g,h}(w, s) \right| > \varepsilon \right) \rightarrow 0.$$

456 On the other hand, applying (1) of Lemma 12 to  $D = D_\varepsilon$ , together with Lemma 13, we have

$$\mathbb{P} \left( \min_{w \in D_\varepsilon} \max_s \Phi_X(w, s) > \min_w \max_s \Phi_X(w, s) + C(\varepsilon) + \varepsilon \right) \rightarrow 0,$$



which establishes (14) with  $\delta(\varepsilon) = C(\varepsilon) + \varepsilon$ , where  $C(\varepsilon) > 0$  is defined in Lemma 13. Therefore, we have the empirical distribution of  $(\hat{u}_n, \beta^*)$  is close to the target distribution  $\nu^*$ , i.e.,

$$\mathbb{P}(W_2(\hat{\nu}_{(\hat{u}_n, \beta^*)}, \nu^*)) \rightarrow 0. \quad (15)$$

Finally, according to Lemma 8 and 7,  $N_p(\cdot)$  and  $M_p(\cdot)$  are with high probability uniformly close. Together with strong convexity of  $N_p(\cdot)$ , we have for any  $\kappa > 0$

$$\mathbb{P}\left(\frac{1}{p}\|\hat{u} - \hat{u}_N\|^2 < \kappa\right) \rightarrow 0. \quad (16)$$

Theorem 1 is therefore given by (15) and (16).

In order to prove Lemma 12 using Theorem 2, one only needs to establish that the optimizer of  $\Phi_X(w, s)$  always has bounded norm with high probability. In fact, Lemma 7 ensures boundedness of  $\hat{w} = \arg \min_w \max_s \Phi_X(w, s)$  while the boundedness of  $\hat{s} := \arg \max_s \Phi_X(\hat{w}, s)$  can be established by a similar argument.

Now we turn to Lemma 13. Define

$$\tilde{\Gamma}_{g,h}(b, \tau) := \frac{b}{2}\left(\frac{\sigma^2}{\tau} + \tau\right) - \frac{b^2}{2} + \frac{1}{\alpha} \min_{w \in D_\varepsilon} \sum_{i=1}^p \left[ \frac{1}{p} \left\{ \frac{b}{2\tau} w_i^2 - bg_i w_i + \sigma^2 F(w_i + \beta_i^*) - \sigma^2 F(\beta_i^*) \right\} \right].$$

It is obvious that  $\tilde{\Gamma}_{g,h}(b, \tau) \geq \Gamma_{g,h}(b, \tau)$  for any fixed  $(b, \tau)$  deterministically. By the max-min inequality,

$$\begin{aligned} \min_{w \in D_\varepsilon} \max_s \Psi_{g,h}(w, s) &\geq \max_s \min_{w \in D_\varepsilon} \Psi_{g,h}(w, s) \\ &= \max_{b \geq 0} \min_{\tau \geq \sigma} \tilde{\Gamma}_{g,h}(b, \tau) + o_n(1) \\ &\geq \min_{\tau \geq \sigma} \tilde{\Gamma}_{g,h}(b^*, \tau) + o_n(1) \\ &= \tilde{\Gamma}_{g,h}(b^*, \tilde{\tau}(b^*)) + o_n(1) \\ &\stackrel{(i)}{\geq} \Gamma_{g,h}(b^*, \tilde{\tau}(b^*)) + o_n(1) \\ &\stackrel{(ii)}{\geq} \min_{\tau \geq \sigma} \Gamma_{g,h}(b^*, \tau) + o_n(1) \\ &= \Gamma_{g,h}(b^*, \tau^*) + o_n(1) \\ &= \min_{w \in \mathbb{R}^p} \max_s \Psi_{g,h}(w, s) + o_n(1), \end{aligned}$$

where  $\tilde{\tau}(b^*) := \arg \min_{\tau \geq \sigma} \tilde{\Gamma}_{g,h}(b^*, \tau)$ . Note that Lemma 13 is equivalent to

$$\mathbb{P}\left(\min_{w \in D_\varepsilon} \max_s \Psi_{g,h}(w, s) - \min_{w \in \mathbb{R}^p} \max_s \Psi_{g,h}(w, s) > C(\varepsilon)\right) \rightarrow 1,$$

which can be established by noticing that the gaps resulting from (i) and (ii) can not be both negligible.

## C Numerical simulations

All source code can be found in a separate *zip* file submitted together with this PDF.

### C.1 Universality: non-Gaussian design matrix

Instead of assuming  $X_{ij} \stackrel{iid}{\sim} \mathcal{N}(0, 1/n)$ , we now present empirical evidence of universality, i.e., Theorem 1 holds for a broader class of design matrix that has *iid* entries with variance  $1/n$ . Since it is impossible to exhaust all possible distributions, we will stick with a representative example  $X_{ij} \stackrel{iid}{\sim} \text{Laplace}(\sqrt{2}/2)$  and the Gaussian spike and slab prior. We use Gradient Decent to optimize  $M_p(u)$  and then demonstrate empirical MSE of its optimizer coincides with the prediction of Corollary 2. Please see Figure 4 for a visual summary.

For more comprehensive and rigorous results on universality of Gaussian comparison inequalities, we refer interested readers to [9] and references within.

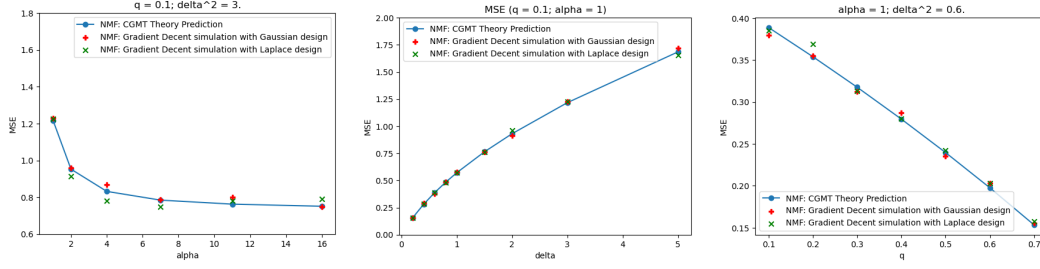

Figure 4: *iid* Gaussian design versus *iid* Laplace design (with Gaussian spike and slab prior): These three plots showcase the empirical observation that prediction of Corollary 2 seem to be valid for a design matrix with *iid* entries that have sub-exponential tails.

## 482 C.2 Fixed point equation

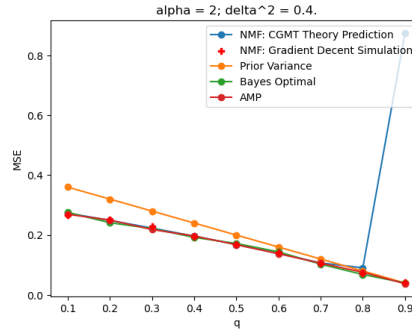

Figure 5: As we can see, when  $q$  is large ( $q = 0.8$  or  $0.9$  in the figure above), our initialization did not lead to the right fixed point. On the other hand, the right panel showcases the fact that the iterative algorithm might not converge for small  $\alpha$ .

483 As allude in the main text, all our plots are generated by iteratively solving the fixed point equation  
 484 (10). However, this naive strategy might not give the right fixed point, i.e., the  $(b^*, \tau^*)$  that minimizes  
 485  $\phi(b, \tau)$ , or it could just do not converge. Please see Figure 5 for an empirical example. In fact, since  
 486 either  $F(\cdot)$  or  $\eta(\cdot, \cdot)$  lacks analytical forms for most natural priors, unlike other applications of CGMT  
 487 (e.g. asymptotic analysis of lasso [13]), it is hard to determine whether (10) has an unique solution.  
 488 Fortunately, there are two possible remedies. First, which is the option we took, one could solve  
 489  $\min_u M_p(u)$  for some large  $n$  and check if the empirical MSE matches the prediction by the fixed  
 490 point  $(b^*, \tau^*)$ . Alternatively, one could adapt a more brute-force way to find the actual optimizer of  
 491  $\max_b \min_\tau \phi(b, \tau)$ , e.g. grid search or iteratively solving (10) with multiple initializations. After all,  
 492 it is only an two dimensional scalar optimization problem. We chose to follow the first way simply  
 493 because we want to use empirical simulations to corroborate our theoretical predictions anyway.
